# Supplementary material
Source: PubMed Central journal article supplement (PMC7033964)

**Antibiotic alleviates radiation-induced intestinal injury by remodeling microbiota, reducing inflammation, and inhibiting fibrosis**

Zhenguo Zhao<sup>a,1</sup>, Wei Cheng<sup>b,1</sup>, Wei Qu<sup>c</sup>, Guoyi Shao<sup>a,\*</sup>, Shuanghai Liu<sup>a,\*</sup>

Authors and Affiliations:

<sup>a</sup>Department of General Surgery, The Affiliated Jiangyin Hospital of Southeast University Medical College, Jiangsu, China.

<sup>b</sup>Department of General Surgery, Jiangsu Province Hospital of Chinese Medicine, Affiliated Hospital of Nanjing University of Chinese Medicine, Nanjing 210029, China.

<sup>c</sup>Department of Pharmacy, The Affiliated Jiangyin Hospital of Southeast University Medical College, Jiangsu, China.

\*Address for reprint requests and other correspondence:

Guoyi Shao: Department of General Surgery, The Affiliated Jiangyin Hospital of Southeast University Medical College, Jiangsu, China. 214400 (e-mail: shaoguoyi666@163.com).

Shuanghai Liu: Department of General Surgery, The Affiliated Jiangyin Hospital of Southeast University Medical College, Jiangsu, China. 214400 (e-mail: shuanghailiu@126.com).

<sup>1</sup>These authors contributed equally.

All authors' email addresses:

Zhenguo Zhao: 54yonggan@163.com

Wei Cheng: chengwei0708@yeah.net

Wei Qu: cpuquwei@163.com

Guoyi Shao: shaoguoyi666@163.com

Shuanghai Liu: shuanghailiu@126.com

**Figure S1: Antibiotic pretreatment influences ileum histomorphology of mice**

HE staining of ileum ( $\times 100$ ). The results were expressed as mean  $\pm$  SEM. n = 5. \*\*P

< 0.01, \*\*\* P < 0.001, \*\*\*\* P < 0.0001.

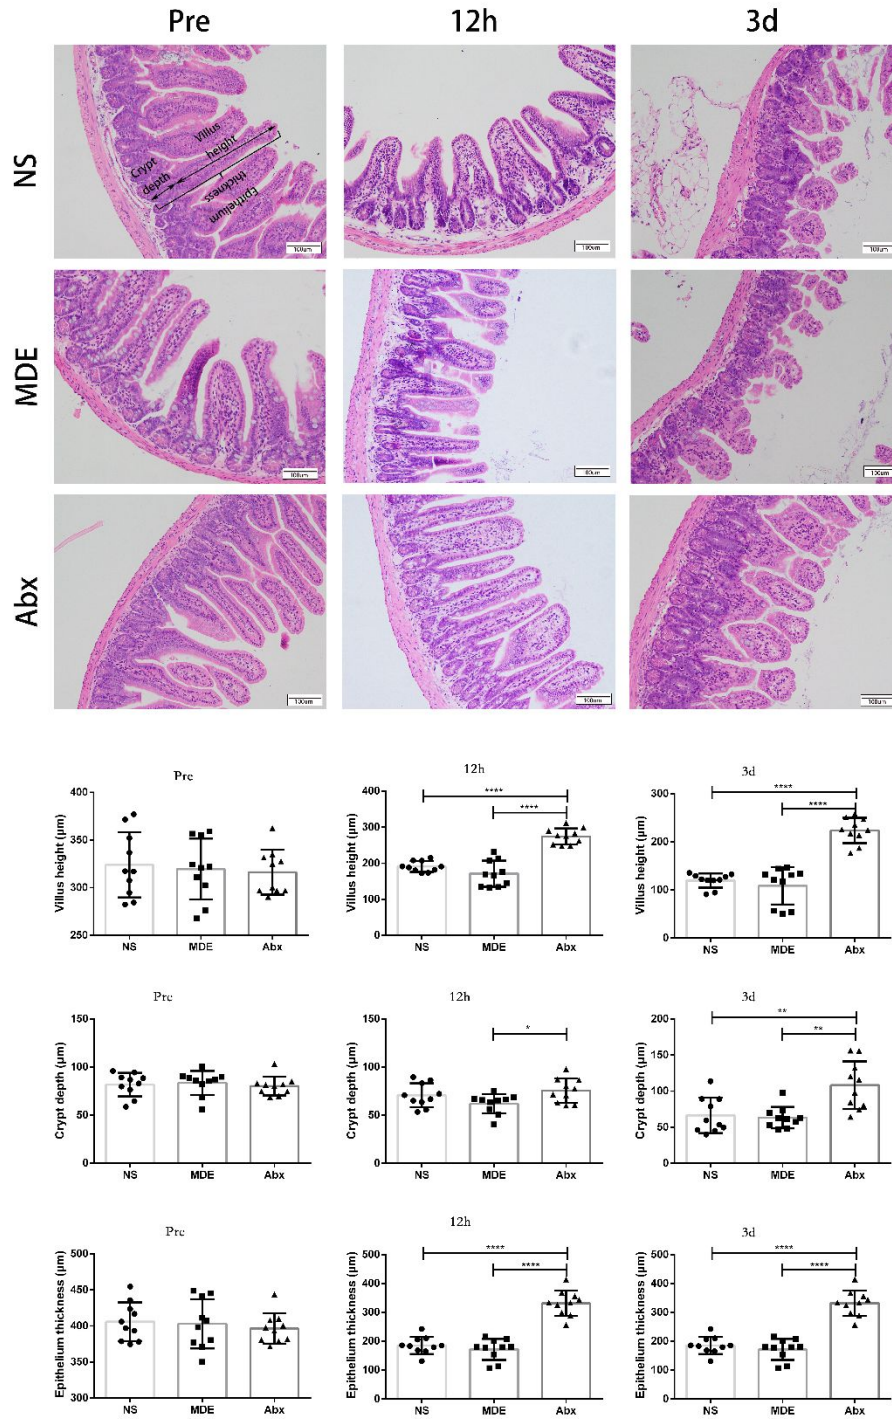

## Figure S2: Antibiotic pretreatment influences ileum apoptosis and proliferation of mice

(A) Ki67 staining of ileum ( $\times 50$ ). (B) Statistics of Ki67 staining results. The results were expressed as mean  $\pm$  SEM.  $n = 5$ . \*\* $P < 0.01$ , \*\*\*  $P < 0.001$ , \*\*\*\*  $P < 0.0001$ .

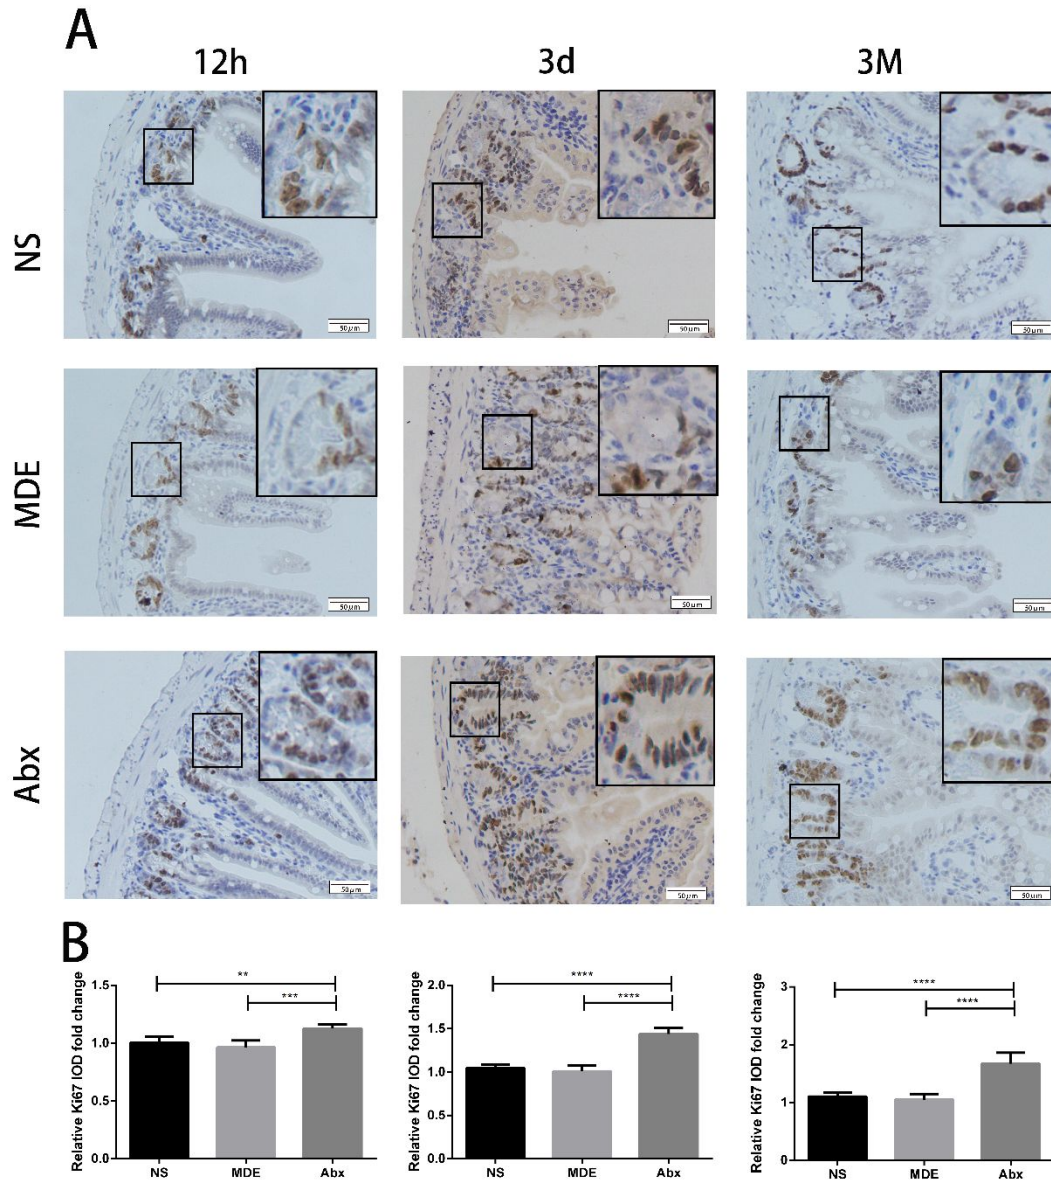

### Figure S3: Antibiotic pretreatment influences ileal fibrosis in mice

HE staining of ileum ( $\times 100$ ). The results were expressed as mean  $\pm$  SEM.  $n = 5$ . \* $P < 0.05$ , \*\* $P < 0.01$ .

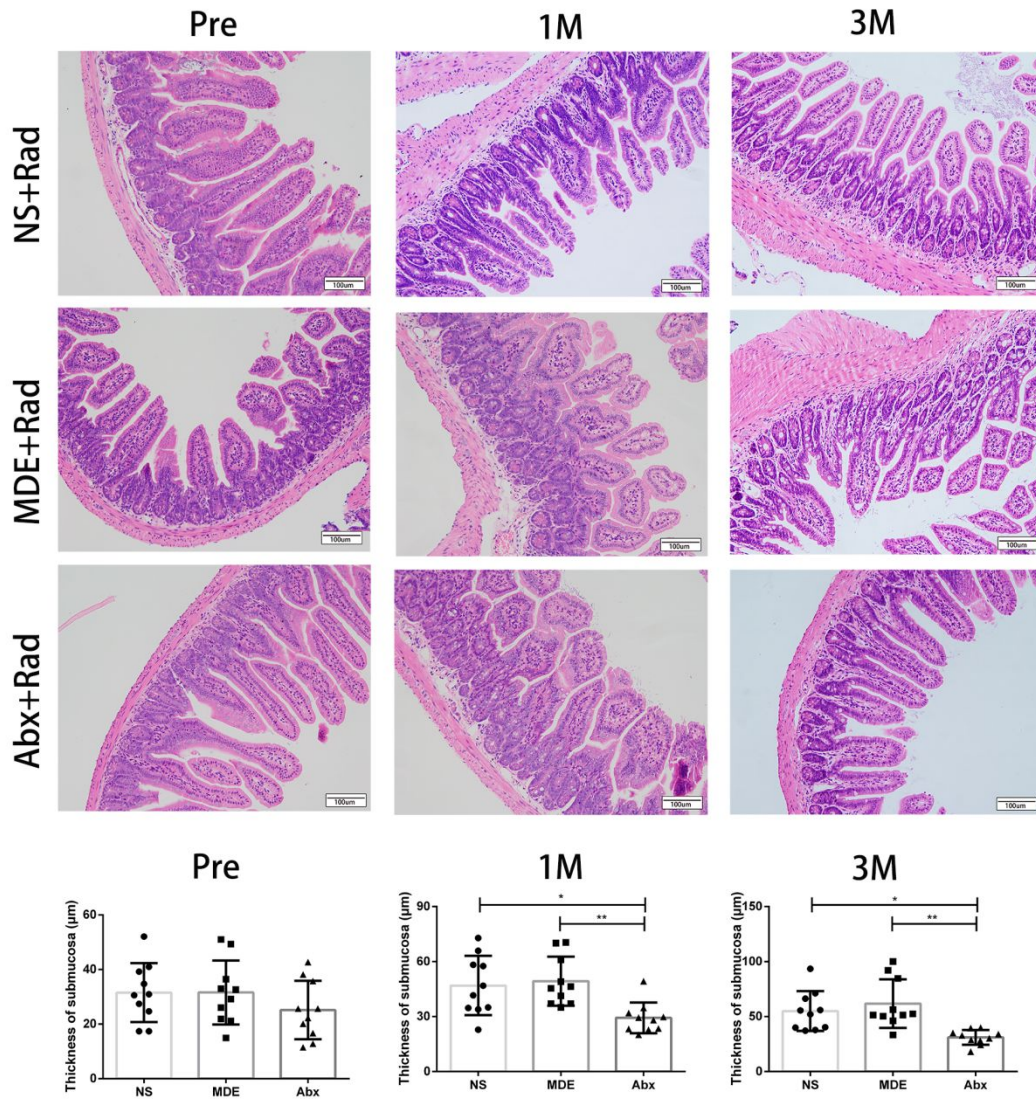

Supplement: ao9b03906_si_001.pdf [file ao9b03906_si_001.pdf]
